# Supplementary material for: WITHDRAWN: Machine Learning-Based Integration of Multiple Indicators to Predict Ureteral Access Sheath Placement Failure During Flexible Ureteroscopic Lithotripsy
Source: Research Square preprint supplement (doi:10.21203/rs.3.rs-7425013/v1), 2025-09-08
Supplement: Supplementary file 1 [file 0630fd69fe7bff846b563c3e.xlsx]

## Sheet: Table1
	Table 1. Baseline characteristics of the entire cohort
	Variables	Sheath Insertion (n = 651)		χ²/Z value2	P value2
		Failure1 (n = 196)	Success1 (n = 455)
	Age (years)	52.00 (39.00, 60.00)	53.00 (41.00, 60.00)	-0.67	0.503
	Gender			2.16	0.332
	Male	139 (70.92%)	297 (65.27%)
	Nullipara	3 (1.53%)	11 (2.42%)
	Para	54 (27.55%)	147 (32.31%)
	Height (m)	1.65 (1.58, 1.71)	1.65 (1.58, 1.70)	-1.13	0.26
	Weight (kg)	67.00 (57.38, 75.00)	65.00 (59.00, 74.00)	-0.661	0.509
	BMI (kg/m²)	24.22 (22.04, 27.40)	24.52 (22.49, 26.57)	-0.231	0.817
	Hypertension History			3.39	0.066
	No	154 (78.57%)	326 (71.65%)
	Yes	42 (21.43%)	129 (28.35%)
	Diabetes Mellitus History			0.533	0.465
	No	173 (88.27%)	392 (86.15%)
	Yes	23 (11.73%)	63 (13.85%)
	Coronary Heart Disease History			0.156	0.693
	No	186 (94.90%)	435 (95.60%)
	Yes	10 (5.10%)	20 (4.40%)
	Duration of Illness (days)	11.00 (3.00, 90.00)	20.00 (7.00, 150.00)	-2.94	0.003**
	History of renal colic			3.95	0.047*
	No	39 (19.90%)	124 (27.25%)
	Yes	157 (80.10%)	331 (72.75%)
	History of Spontaneous Calculus Passage			0.44	0.537
	No	191 (97.45%)	447 (98.24%)
	Yes	5 (2.55%)	8 (1.76%)
	History of Ureteroscopy on the Involved Side			6.18	0.013*
	No	188 (95.92%)	410 (90.11%)
	Yes	8 (4.08%)	45 (9.89%)
	ESWL History on the Involved Side			0.796	0.372
	No	179 (91.33%)	405 (89.01%)
	Yes	17 (8.67%)	50 (10.99%)
	PCNL History on the Involved Side			6.9	0.009**
	No	194 (98.98%)	430 (94.51%)
	Yes	2 (1.02%)	25 (5.49%)
	Laterality of calculus			0.044	0.834
	Left	106 (54.08%)	242 (53.19%)
	Right	90 (45.92%)	213 (46.81%)
	Calculus Location			0.102	0.749
	Renal calculus	51 (26.02%)	113 (24.84%)
	Ureteral calculus	145 (73.98%)	342 (75.16%)
	Hydronephrosis			1.34	0.247
	No	135 (68.88%)	292 (64.18%)
	Yes	61 (31.12%)	163 (35.82%)
	Anesthesia			24	P <0.001***
	General Anesthesia	103 (52.55%)	329 (72.31%)
	Local Anesthesia	93 (47.45%)	126 (27.69%)
	WBC (109/L)	6.71 (5.37, 9.08)	6.62 (5.34, 8.18)	-1.42	0.155
	Neutrophils (109/L)	4.15 (3.06, 6.26)	3.98 (3.06, 5.42)	-1.5	0.135
	Lymphocytes (109/L)	1.70 (1.34, 2.10)	1.78 (1.42, 2.20)	-1.53	0.125
	Monocytes (109/L)	0.47 (0.38, 0.64)	0.46 (0.35, 0.58)	-1.74	0.082
	Platelets (109/L)	215.50 (186.75, 264.00)	222.00 (190.00, 272.00)	-1.1	0.273
	Neutrophil Percentage (%)	0.63 (0.54, 0.73)	0.61 (0.55, 0.68)	-1.86	0.064
	Lymphocyte Percentage (%)	0.27 (0.18, 0.34)	0.29 (0.22, 0.35)	-1.69	0.091
	Monocyte Percentage (%)	0.07 (0.06, 0.09)	0.07 (0.06, 0.08)	-1.53	0.126
	NLR	2.36 (1.68, 4.17)	2.12 (1.60, 3.23)	-1.74	0.082
	NPR	0.02 (0.01, 0.03)	0.02 (0.01, 0.02)	-2.16	0.031*
	PLR	127.45 (101.90, 167.04)	127.05 (99.49, 160.72)	-0.316	0.752
	LMR	3.61 (2.43, 5.06)	3.98 (2.92, 5.23)	-1.84	0.065
	MLR	0.28 (0.20, 0.41)	0.25 (0.19, 0.34)	-1.84	0.065
	SIRI	1.06 (0.65, 2.08)	0.96 (0.63, 1.70)	-1.73	0.083
	SII	525.07 (335.70, 859.20)	496.68 (340.10, 770.88)	-1.07	0.284
	AISI	233.72 (144.24, 553.37)	221.85 (132.18, 419.44)	-1.17	0.242
	Urinary WBC (cells/μL)	19.50 (10.00, 53.25)	32.00 (11.00, 78.00)	-2.36	0.018*
	Urinary RBC (cells/μL)	29.50 (6.75, 231.25)	31.00 (7.00, 175.50)	-0.11	0.912
	Calculus Short Diameter (mm)	7.83 (5.89, 10.99)	8.31 (6.42, 11.23)	-1.76	0.079
	Calculus Long Diameter (mm)	9.77 (7.63, 13.13)	11.29 (8.32, 14.36)	-2.99	0.003**
	Maximum hydronephrosis diameter (mm)	0.00 (0.00, 27.94)	0.00 (0.00, 34.17)	-1.54	0.123
	Minimum hydronephrosis diameter (mm)	0.00 (0.00, 13.96)	0.00 (0.00, 18.91)	-1.36	0.175
	Renal parenchyma widest part diameter (mm)	25.66 (22.57, 30.16)	25.40 (22.20, 29.24)	-1.29	0.196
	Renal parenchyma narrowest part diameter (mm)	13.22 (11.46, 15.45)	13.15 (11.23, 15.09)	-0.78	0.435
	Proximal ureteral diameter (mm)	8.34 (6.30, 10.21)	9.42 (6.84, 11.70)	-2.95	0.003**
	Mid-ureteral diameter (mm)	4.56 (4.13, 5.13)	5.43 (4.86, 6.50)	-10.3	P <0.001***
	Distal ureteral diameter (mm)	4.43 (4.12, 4.83)	4.92 (4.61, 5.32)	-9.59	P <0.001***
	Abdominal aorta diameter (mm)	17.34 (15.72, 18.87)	17.31 (15.96, 18.80)	-0.203	0.839
	Ipsilateral common iliac artery diameter (mm)	12.63 (11.47, 13.93)	12.51 (11.29, 13.89)	-0.655	0.512
	Contralateral common iliac artery diameter (mm)	12.45 (11.32, 14.22)	12.54 (11.18, 13.98)	-0.173	0.863
	1n (%); Median (Q1,Q3)
	2Pearson's Chi-squared test; Fisher's exact test; Wilcoxon rank sum test
	Significance markers : ***P < 0.001, **P < 0.01, *P < 0.05
