# Supplementary material for: WITHDRAWN: Machine Learning-Based Integration of Multiple Indicators to Predict Ureteral Access Sheath Placement Failure During Flexible Ureteroscopic Lithotripsy
Source: Research Square preprint supplement (doi:10.21203/rs.3.rs-7425013/v1), 2025-09-08
Supplement: Supplementary file 2 [file b40f40ee3313c3836efca3a4.xlsx]

## Sheet: Supplemental table1
	Supplemental table 1. The optimal parameters for the nine machine learning methods.
	Method	Parameter	Value
	DT	cost complexity	0.0338
		tree depth	3
		min n	10
	RF	mtry	10
		trees	200
		min n	50
	XGBoost	mtry	6
		min n	6
		tree depth	3
		learn rate	0.00891
		loss reduction	0.692
		sample size	0.889
	ENet	penalty	0.278
		mixture	0.25
	SVM	cost	0.0312
		rbf sigma	0.00316
	MLP	hidden units	24
		penalty	1
		epochs	150
	Logistic	/	/
	LightGBM	mtry	6
		trees	327
		min n	7
		tree depth	1
		learn rate	0.00823
		loss reduction	0.0148
	KNN	neighbors	7

## Sheet: Supplemental table2
	Supplemental table 2. The optimal parameters for random forest.
	Method	Parameter	Value
	RF	mtry	10
		trees	500
		min n	50
